# Supplementary material for: Hydrolysis-deficient mosaic microtubules as faithful mimics of the GTP cap
Source: Springer Nature journal article supplement (doi:10.1038/s41467-025-57555-6), 2025-03-10
Supplement: MOESM1 [file 41467_2025_57555_MOESM1_ESM.pdf]

## Supplemental information

Hydrolysis-deficient mosaic microtubules as faithful mimics of the GTP cap

Juan Estévez-Gallego\*, Thorsten B. Blum<sup>+</sup>, Felix Ruhn<sup>+</sup>, María Gili, Silvia Speroni, Raquel García-Castellanos, Michel O. Steinmetz and Thomas Surrey\*.

\* Corresponding authors: [juan.estevez-gallego@psi.ch](mailto:juan.estevez-gallego@psi.ch), [thomas.surrey@crg.eu](mailto:thomas.surrey@crg.eu).

<sup>+</sup> Contributed equally

**This PDF file includes:**

- Supplementary figures 1 to 9
- Supplementary tables 1 to 3

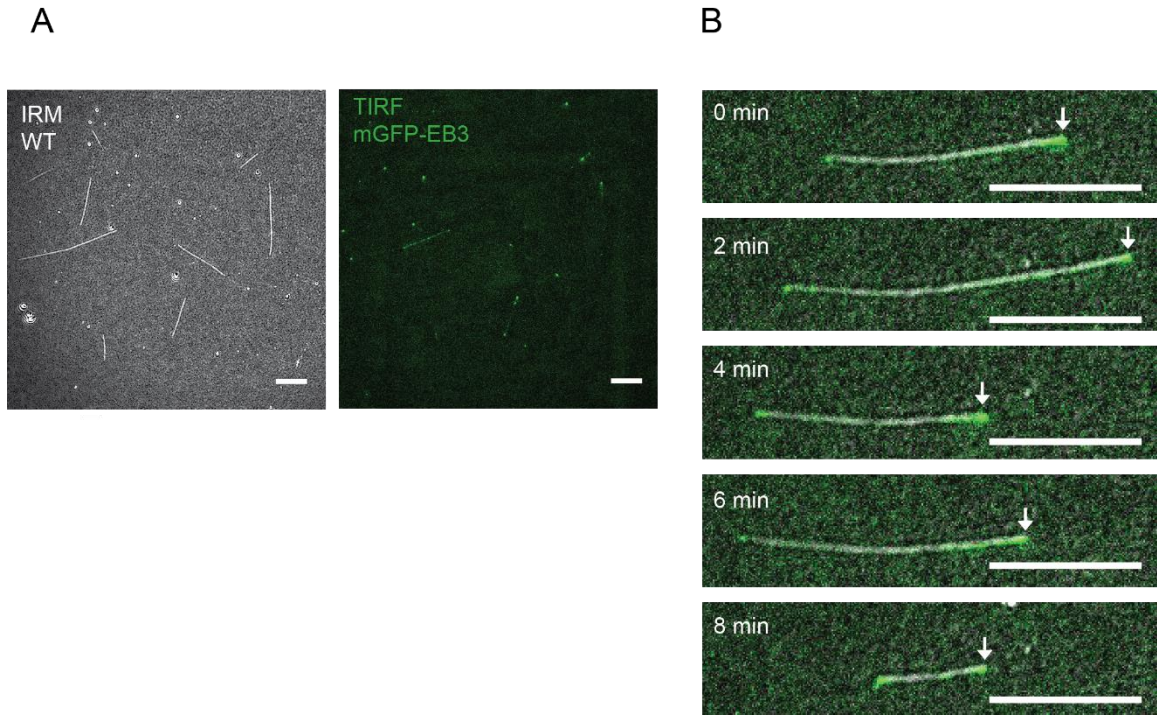

**Supplementary Figure 1. mGFP-EB3 binding to wild type human microtubules. A.** IRM/TIRF microscopy images of unlabeled E254E (WT) microtubules, elongating from glass-attached GMPCPP-microtubule seeds in the presence of 40 nM mGFP-EB3. **B.** Magnified view of a single microtubule at different times, as indicated. White arrows highlight the EB3 comet at the growing microtubule plus end. The microtubule displays dynamic instability, switching between growth and shrinkage; all images show the microtubule in a state of growth. Scale bars represent 10  $\mu\text{m}$ .

A

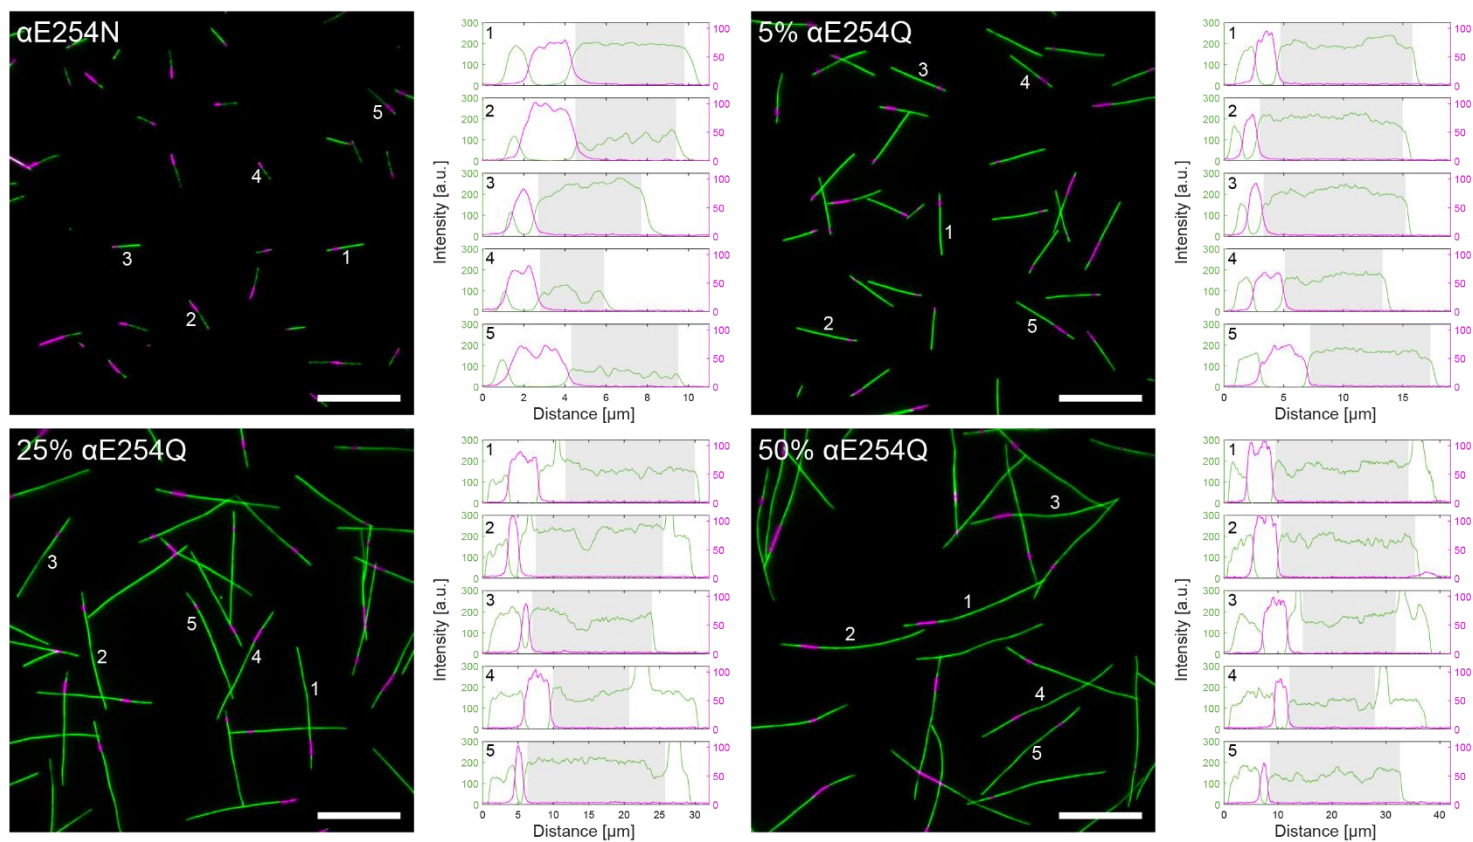

B

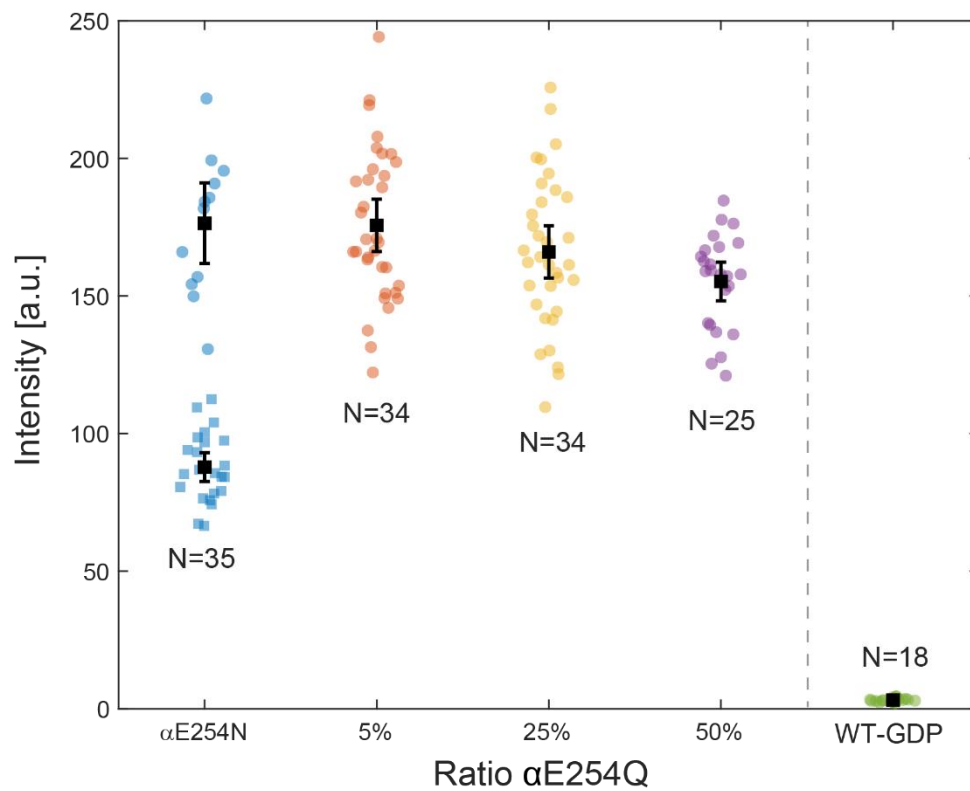

**Supplementary Figure 2. Quantitative analysis of the mGFP-EB3 intensity along different microtubules.** **A.** TIRF microscopy images (same contrast for all 4 images; scale bar 20  $\mu\text{m}$ ) of mGFP-EB3 (green) binding to  $\alpha\text{E254N}$ -microtubules and to  $\alpha\text{E254Q}+\alpha\text{E254N}$  mosaic microtubules at the indicated  $\alpha\text{E254Q}$  percentages in the tubulin mixture, elongated from GMPCPP-microtubule seeds (magenta). Line scans show integrated intensity of mGFP-EB3 (green) and GMPCPP-seeds (magenta). Gray area indicates intensities used for averaging the EB3-GFP signal along every microtubule plus segment (excluding seeds and microtubule crossings). **B.** Average mGFP-EB3 intensities for conditions shown in A and for wild type GDP-microtubule segments (excluding the GTP cap region). N = number of microtubules analyzed for each condition. For  $\alpha\text{E254N}$ -microtubules, we could manually classify microtubules with brighter (circles, n=12) and dimmer (squares, n=23) mGFP-EB3 coverage. The total tubulin concentration was always 10  $\mu\text{M}$ . Error bars indicate mean  $\pm 2 \times \text{SEM}$  (95%CI).

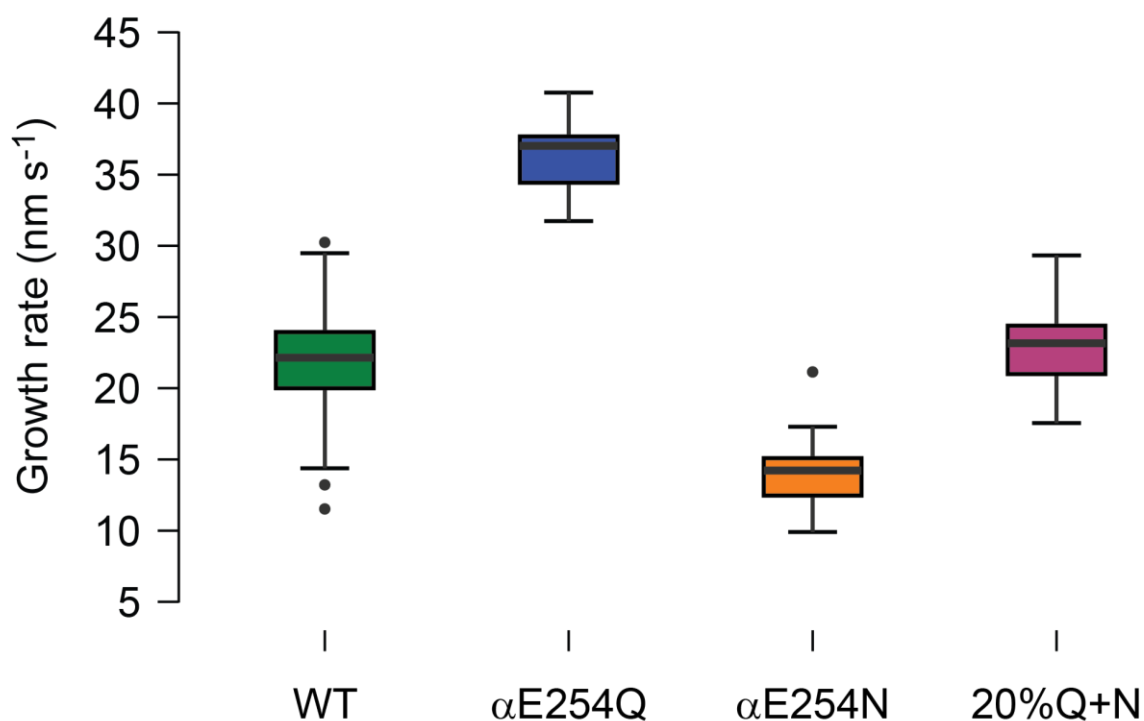

**Supplementary Figure 3. Comparison of microtubule growth rates.** Box plots of microtubule growth rates at a total concentration of 10  $\mu\text{M}$  of WT (green),  $\alpha\text{E254Q}$  (blue),  $\alpha\text{E254N}$  (orange), and 20%Q+N-tubulin (purple). Within each box, horizontal black lines denote median values; boxes extend from the 25th to the 75th percentile of each group's distribution of values; vertical extending lines denote the extreme values within 1.5 interquartile range of the 25th and 75th percentile of each group; dots denote observations outside the range of adjacent values. These data are the same as those shown in Figure 4B and Supplementary Table 1 for the 10  $\mu\text{M}$  tubulin condition.

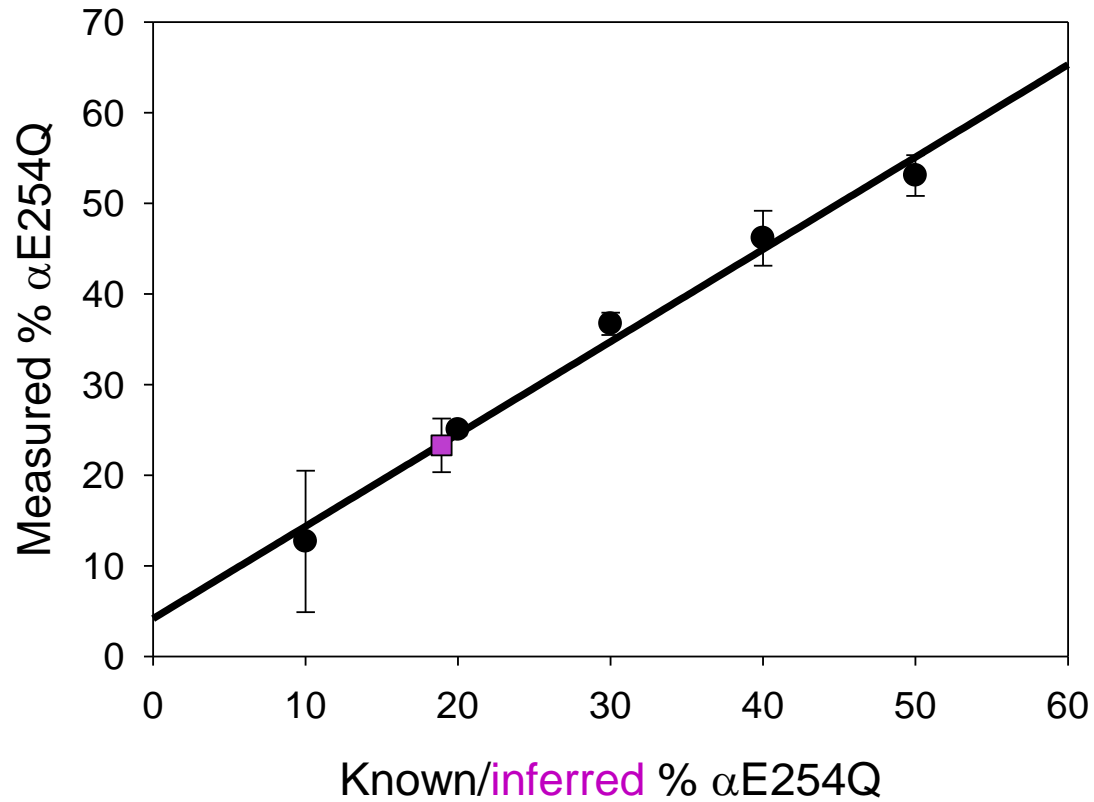

**Supplementary Figure 4.** LC-MS/MS mass spectrometry analysis. The measured percentages of  $\alpha$ E254Q-tubulin in (unpolymerized)  $\alpha$ E254Q+ $\alpha$ E254N tubulin mixtures are plotted as a function of the known  $\alpha$ E254Q-tubulin content of the mixtures (black circles) to obtain a calibration curve (black line). The percentage of  $\alpha$ E254Q-tubulin in 20%Q+N-mosaic microtubules was determined from the measured percentage, corrected by the calibration curve, yielding  $18.9\% \pm 4.3$  (purple square). Data represent mean values from  $N = 3$  independent experiments, with  $n = 2$  replicas per condition. Error bars indicate SD.

A

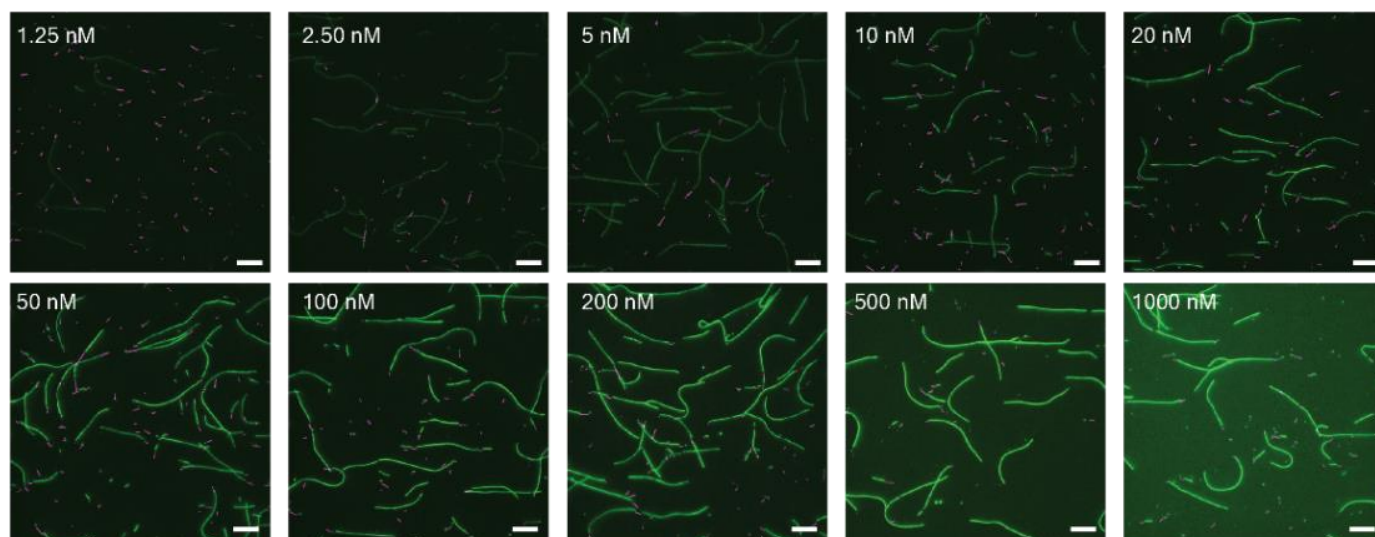

B

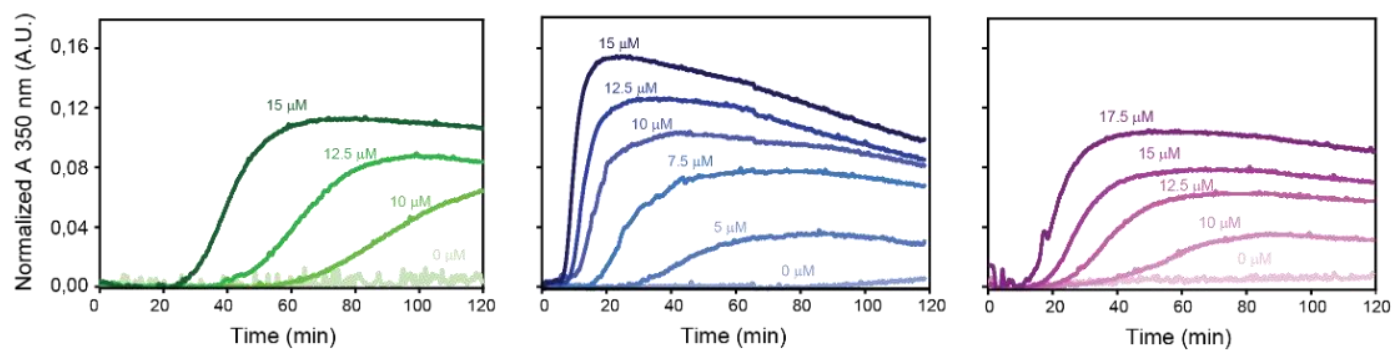

C

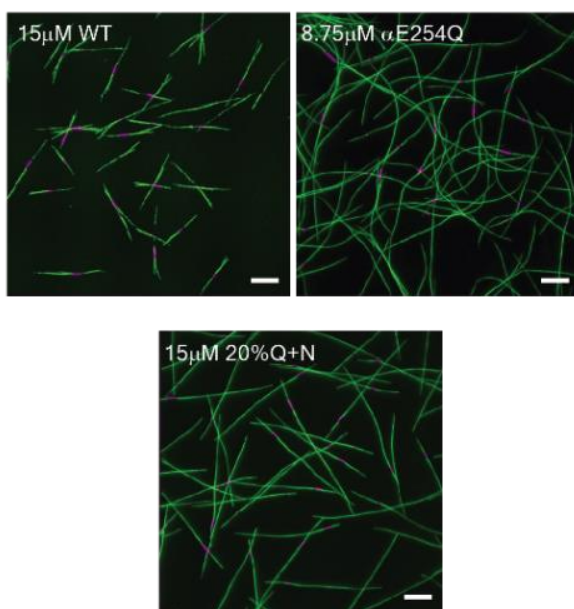

D

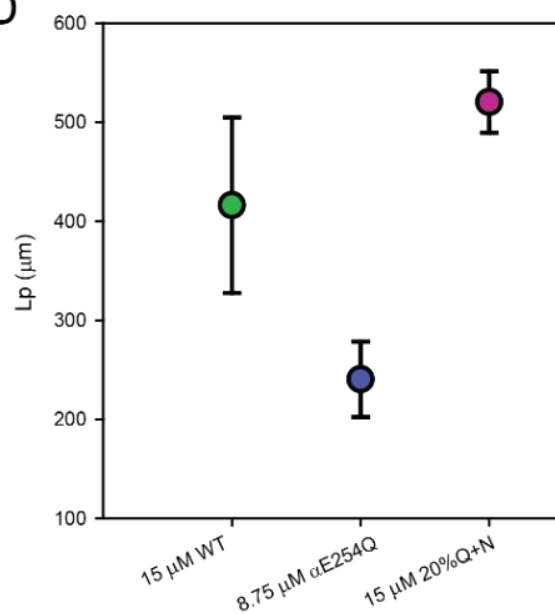

**Supplementary Figure 5. Biochemical characterization of 20%Q+N-mosaic microtubules.** **A.** TIRF microscopy images of 20%Q+N-microtubules in the presence of different mGFP-EB3 concentrations, as indicated, used to determine the  $K_d$  of mGFP-EB3 binding (Fig. 4A). **B.** Time course of turbidity of WT (left, green scale),  $\alpha$ E254Q (center, blue scale), and 20%Q+N-microtubules (right, purple scale) nucleated in solution and polymerizing at the indicated tubulin concentrations, used to calculate the apparent nucleation constant (Fig. 4E). **C, D.** TIRF microscopy images of microtubules elongated from GMPCPP-microtubule seeds at the indicated tubulin concentrations (C), used to calculate the average persistence lengths ( $L_p$ ) of WT,  $\alpha$ E254Q, and 20%Q+N-microtubules (D). Scale bars represent 10  $\mu$ m.  $n = 25$  filaments per condition. Error bars represent SD.



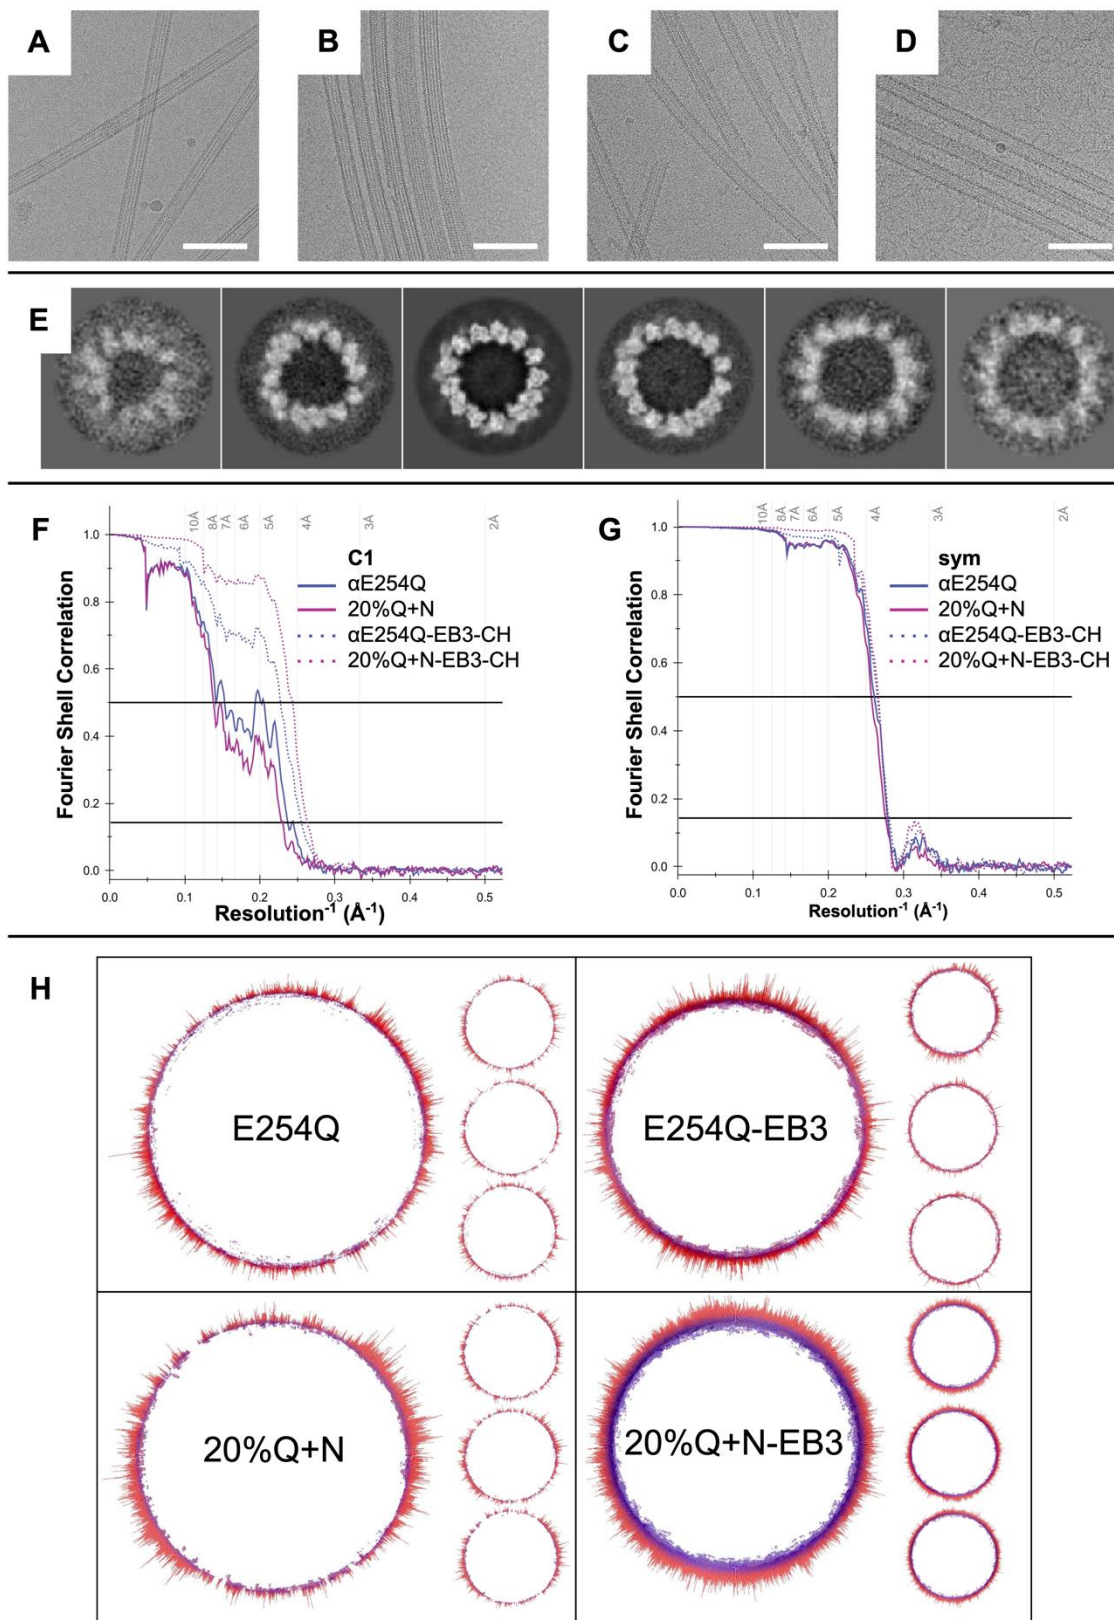

**Supplementary Figure 6. Cryo-EM analysis of microtubules. A-D.** Drift-corrected and dose-weighted micrographs showing microtubules of the four samples that were investigated in this study:  $\alpha$ E254Q- (A), 20%Q+N- (B),  $\alpha$ E254Q-EB3-CH- (C), and 20%Q+N-EB3-CH-microtubules (D). Scale bars, 100 nm. **E.** Picked microtubules were categorized into six classes during data processing. In this representative figure, the classes are derived from the data of the EB3-decorated 20% Q+N microtubules. The six classes, displayed from left to right, include 11, 12, 13, 14, 15, and 16 protofilaments. Notably, the class with 13 protofilaments consistently contained the highest number of particles, making it less noisy. **F, G.** Map:map FSC resolution plots of the final cryo-EM maps of the 13 protofilament microtubules. In panel F, the results of the unsymmetrized maps that have a resolution between 3.8 and 4.3 Å are shown; in panel G, the symmetrized maps that have a resolution of 3.6 Å are shown. **H** Representation of particle angular distribution. The images show the angular distributions of the four different datasets (large figures). The distributions show even orientations around the microtubule cross-section, forming a ring pattern. After splitting each dataset in three (see Methods for further details); the split datasets (small figures) show the same even angular distribution.

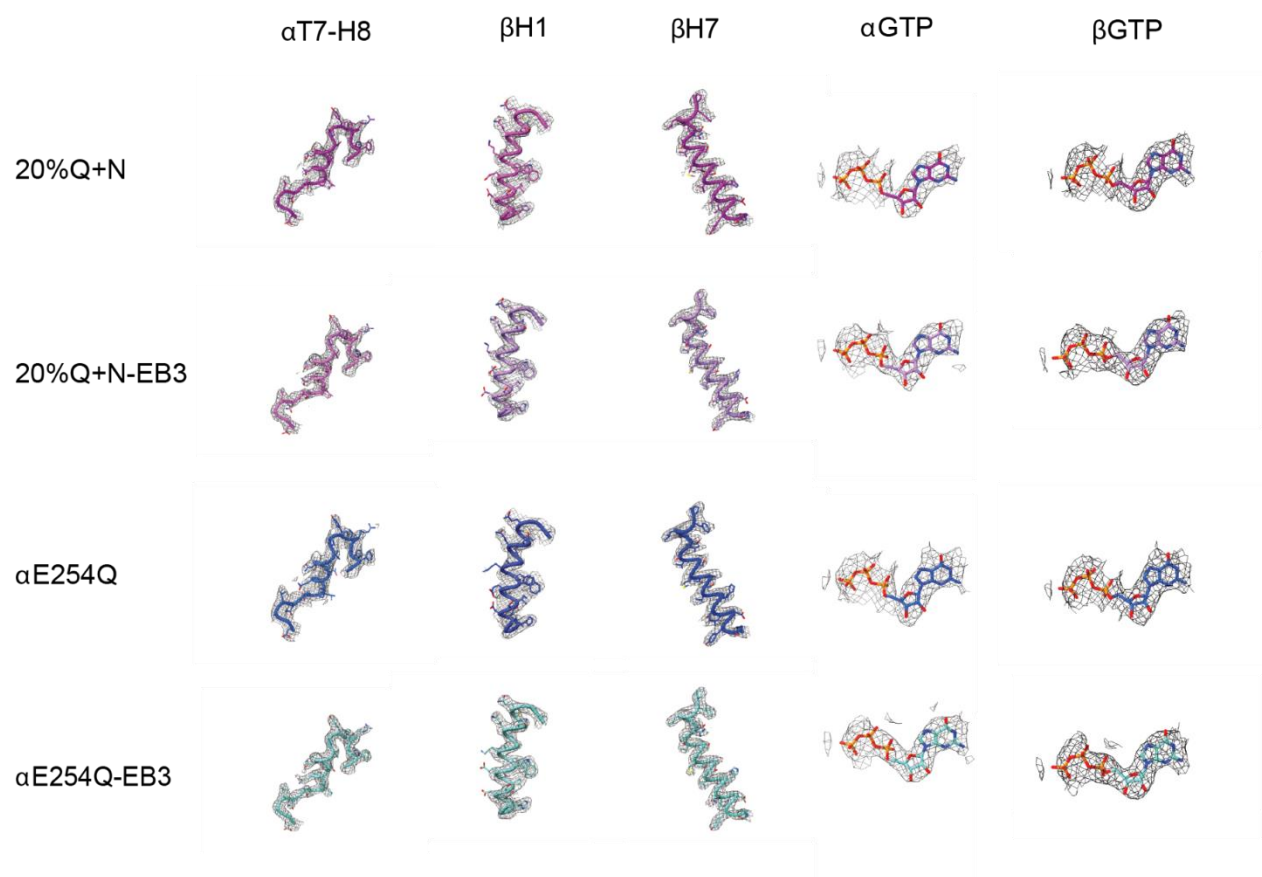

**Supplementary Figure 7.** Model fitting into symmetrized electron density maps. Sections of the symmetrized electron density maps illustrating the quality of model fitting in representative regions of  $\alpha\beta$ -tubulin and bound nucleotides.

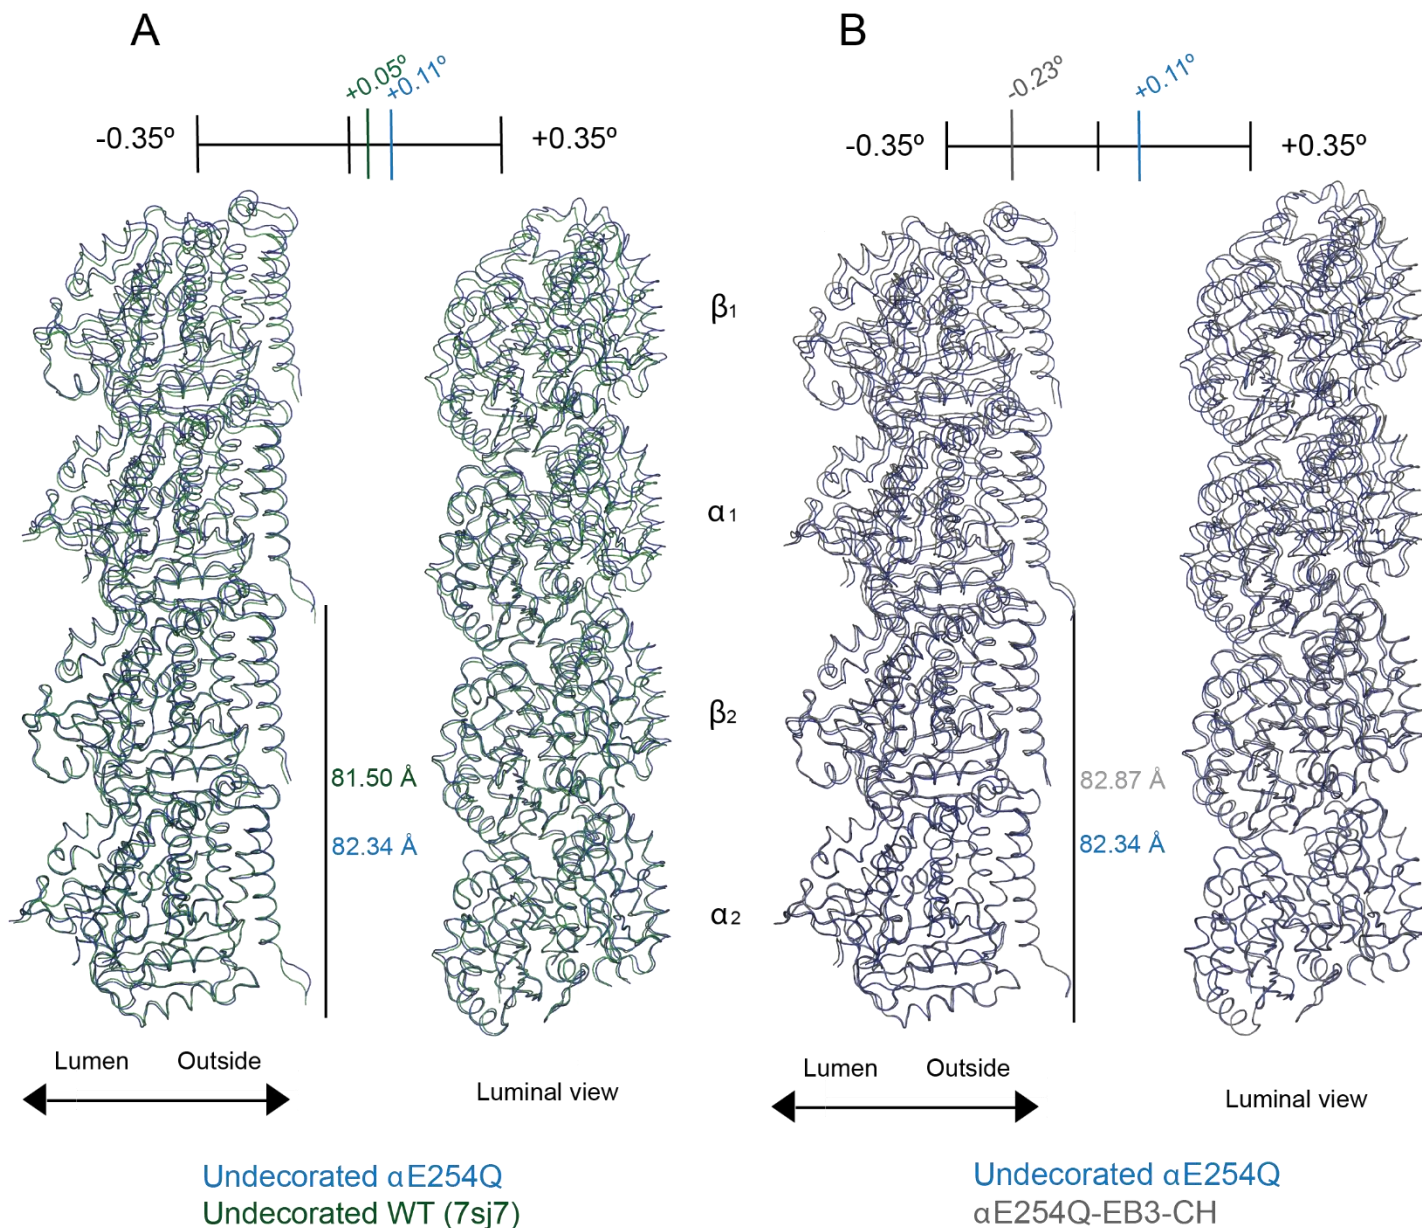

**Supplementary Figure 8. Atomic models of αE254Q-microtubules.** Atomic model building of αE254Q microtubules from their corresponding symmetrized maps. Comparison of the Cα traces of two consecutive dimers after model superimposition on the intermediate domain of the α<sub>2</sub>-tubulin chain. **A.** Comparison between undecorated αE254Q-microtubules (blue) and αE254E microtubules (WT-microtubules, green) (PDB: 7SJ7)<sup>34</sup> [<https://doi.org/10.2210/pdb7SJ7/pdb>] **B.** Comparison between undecorated αE254Q-microtubules (blue) and EB3-CH-αE254Q-microtubules (grey). The dimer rise (next to bottom tubulin dimers) and protofilament twist (at the top) as determined from the C1 maps using RELION are indicated.

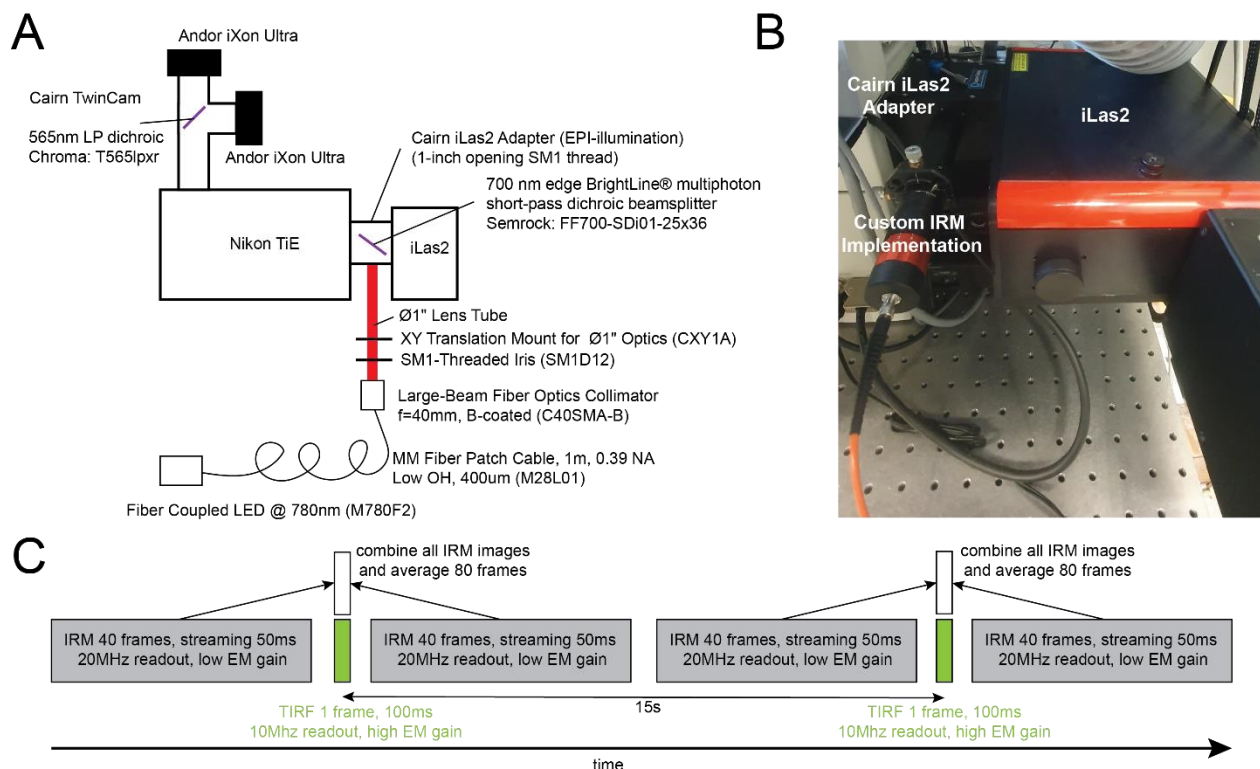

**Supplementary Figure 9. Combined TIRF/IRM time-lapse imaging.** **A.** Schematic of the IRM implementation on a dual-camera TIRF system with rotating TIRF (iLas2, Gataca Systems, France). All parts numbers are from Thorlabs (USA) unless indicated otherwise. **B.** Photo of the IRM add-on installed at the EPI-port of the Cairn iLas2 adapter. **C.** Schematic chart for time-lapse imaging. 40 IRM images were recorded in fast stream acquisition mode, 1 TIRF frame was acquired, and then again 40 IRM images. All 80 IRM images were averaged to a single frame, resulting in one TIRF and one IRM image with approximately the same acquisition time. This process was repeated yielding a time-lapse for both IRM and TIRF with a 15 s time-resolution.



**Supplementary Table 1.** Microtubule growth rates (nm/s, Average  $\pm$  Stdev)

|              | <b>WT</b>      | <b><math>\alpha</math>E254Q</b> | <b><math>\alpha</math>E254N</b> | <b>20%Q+N</b>  |
|--------------|----------------|---------------------------------|---------------------------------|----------------|
| 1.25 $\mu$ M | -              | 3.4 $\pm$ 0.5                   | -                               | -              |
| 2.50 $\mu$ M | -              | 9.0 $\pm$ 0.9                   | -                               | -              |
| 3.75 $\mu$ M | -              | 10.4 $\pm$ 1.2                  | -                               | -              |
| 5.00 $\mu$ M | -              | 15.6 $\pm$ 2.4                  | -                               | 9.9 $\pm$ 1.5  |
| 6.25 $\mu$ M | -              | 22.0 $\pm$ 1.7                  | -                               | -              |
| 7.50 $\mu$ M | -              | 25.9 $\pm$ 2.5                  | -                               | 16.8 $\pm$ 3.3 |
| 8.75 $\mu$ M | -              | 32.0 $\pm$ 2.1                  | -                               | -              |
| 10.0 $\mu$ M | 21.1 $\pm$ 3.4 | -                               | 6.5 $\pm$ 2.6                   | 22.9 $\pm$ 2.4 |
| 12.5 $\mu$ M | 24.1 $\pm$ 4.0 | -                               | 15.3 $\pm$ 2.9                  | 28.5 $\pm$ 3.4 |
| 15.0 $\mu$ M | 32.7 $\pm$ 4.8 | -                               | 18.2 $\pm$ 3.2                  | 32.7 $\pm$ 3.1 |
| 17.5 $\mu$ M | 37.9 $\pm$ 5.9 | -                               | 19.0 $\pm$ 3.0                  | 38.8 $\pm$ 3.8 |
| 20.0 $\mu$ M | 44.6 $\pm$ 7.4 | -                               | 24.8 $\pm$ 0.3                  | -              |

**Supplementary Table 2.** Microtubule protofilament number relative frequencies

|                                     | $\alpha$ E254Q | $\alpha$ E254Q-<br>EB3-CH | $\alpha$ E254QN | $\alpha$ E254QN-<br>EB3-CH |
|-------------------------------------|----------------|---------------------------|-----------------|----------------------------|
| Number of particles<br>of 12-15 pfs | 57,294         | 73,019                    | 36,543          | 142,220                    |
| 12 pf [%]                           | 51.14          | 43.97                     | 10.22           | 4.02                       |
| 13 pf [%]                           | 46.40          | 47.05                     | 88.35           | 89.93                      |
| 14 pf [%]                           | 1.57           | 7.72                      | 0.80            | 5.28                       |
| 15 pf [%]                           | 0.89           | 1.26                      | 0.63            | 0.78                       |

**Supplementary Table 3.** Cryo-EM data collection, refinement and validation statistics

|                                        | <b>13pf-<math>\alpha</math>E254Q</b><br>(EMDB-50172)<br>(PDB 9F3B) | <b>13pf-<math>\alpha</math>E254Q-<br/>EB3-CH</b><br>(EMDB-50177)<br>(PDB 9F3R) | <b>13pf-20%Q+N</b><br>(EMDB-50174)<br>(PDB 9F3H) | <b>13pf-20%Q+N-<br/>EB3-CH</b><br>(EMDB-50178)<br>(PDB 9F3S) |
|----------------------------------------|--------------------------------------------------------------------|--------------------------------------------------------------------------------|--------------------------------------------------|--------------------------------------------------------------|
| <b>Data collection and processing</b>  |                                                                    |                                                                                |                                                  |                                                              |
| Magnification                          | 146,597 x                                                          | 146,597 x                                                                      | 146,597 x                                        | 146,597 x                                                    |
| Voltage (kV)                           | 200                                                                | 200                                                                            | 200                                              | 200                                                          |
| Electron exposure (e-/Å <sup>2</sup> ) | 7.25                                                               | 7.19                                                                           | 7.25                                             | 7.27                                                         |
| Defocus range (μm)                     | -1.0 to -2.5                                                       | -0.7 to -2.2                                                                   | -1.0 to -2.5                                     | -1.0 to -2.5                                                 |
| Pixel size (Å)                         | 0.955                                                              | 0.955                                                                          | 0.955                                            | 0.955                                                        |
| Symmetry imposed                       | Helical                                                            | Helical                                                                        | Helical                                          | Helical                                                      |
| Initial particle images                | 71,850                                                             | 79,270                                                                         | 44,726                                           | 163,854                                                      |
| Final 13PFs particle images            | 26,038                                                             | 33,410                                                                         | 30,691                                           | 142,220                                                      |
| C1 Map resolution (Å)                  | 4.2                                                                | 3.9                                                                            | 4.3                                              | 3.8                                                          |
| Sym Map resolution (Å)                 | 3.6                                                                | 3.6                                                                            | 3.6                                              | 3.6                                                          |
| <b>Refinement</b>                      |                                                                    |                                                                                |                                                  |                                                              |
| Initial model used (PDB code)          | 7sj7                                                               | 7sj7                                                                           | 7sj7                                             | 7sj7                                                         |
| Model resolution (Å)                   | 3.85                                                               | 3.90                                                                           | 3.80                                             | 3.80                                                         |
| FSC <sub>model</sub> (0/0.143/0.5)     | 3.4/3.5/3.9                                                        | 3.4/3.5/3.6                                                                    | 3.5/3.6/3.9                                      | 3.4/3.5/3.6                                                  |
| Non-hydrogen atoms                     | 41,106                                                             | 43,264                                                                         | 41,100                                           | 43,258                                                       |
| Protein residues                       | 5,184                                                              | 5,446                                                                          | 5,184                                            | 5,446                                                        |
| Ligands                                | 24                                                                 | 24                                                                             | 24                                               | 24                                                           |
| Validation:                            |                                                                    |                                                                                |                                                  |                                                              |
| Molprobtity score                      | 1.81                                                               | 1.77                                                                           | 1.84                                             | 1.55                                                         |
| Clashscore, all atoms                  | 11.83                                                              | 9.92                                                                           | 10.74                                            | 7.53                                                         |
| CaBLAM outliers (%)                    | 0.96                                                               | 0.93                                                                           | 0.96                                             | 0.93                                                         |
| Poor rotamers                          | 0.34                                                               | 0.73                                                                           | 0.29                                             | 0.41                                                         |
| Ramachandran plot                      |                                                                    |                                                                                |                                                  |                                                              |
| Favored (%)                            | 96.59                                                              | 96.31                                                                          | 95.74                                            | 97.29                                                        |
| Allowed (%)                            | 3.41                                                               | 3.69                                                                           | 4.26                                             | 2.71                                                         |
| Outliers (%)                           | 0.00                                                               | 0.00                                                                           | 0.00                                             | 0.00                                                         |
